# Supplementary material for: Identification of Ramie Genes in Response to Pratylenchus coffeae Infection Challenge by Digital Gene Expression Analysis
Source: MDPI journal article supplement (doi:10.3390/ijms160921989), 2015-09-11
Supplement: s1 [file s1]

# Supplementary Information

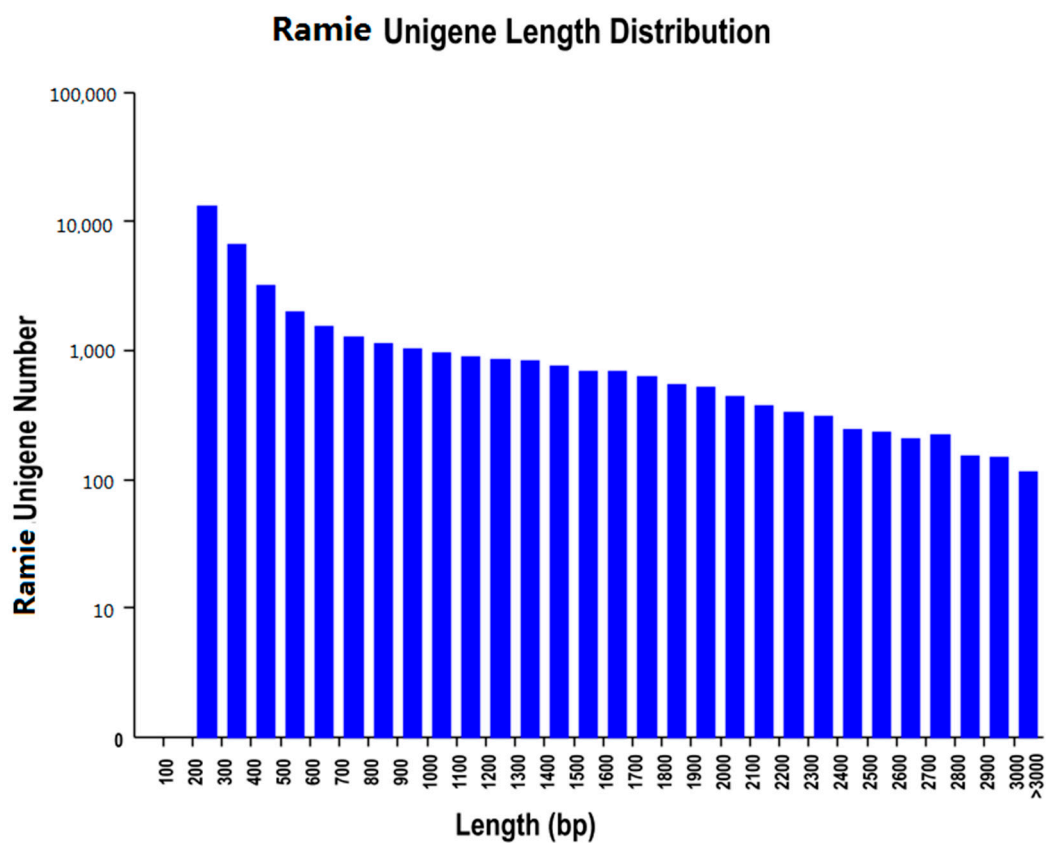

**Figure S1.** Length distribution profiles of unigenes in the cDNA library of fibrous ramie roots.

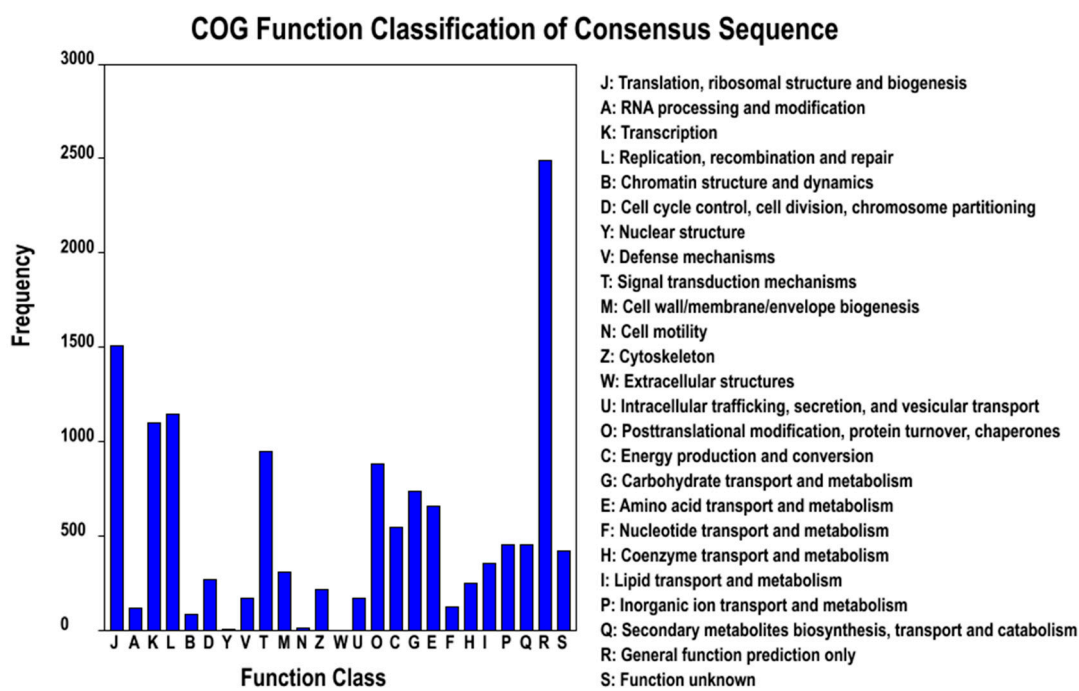

**Figure S2.** Unigenes distribution in COG groups based on classification. 9657 of total unigenes have COG classification within 25 categories.

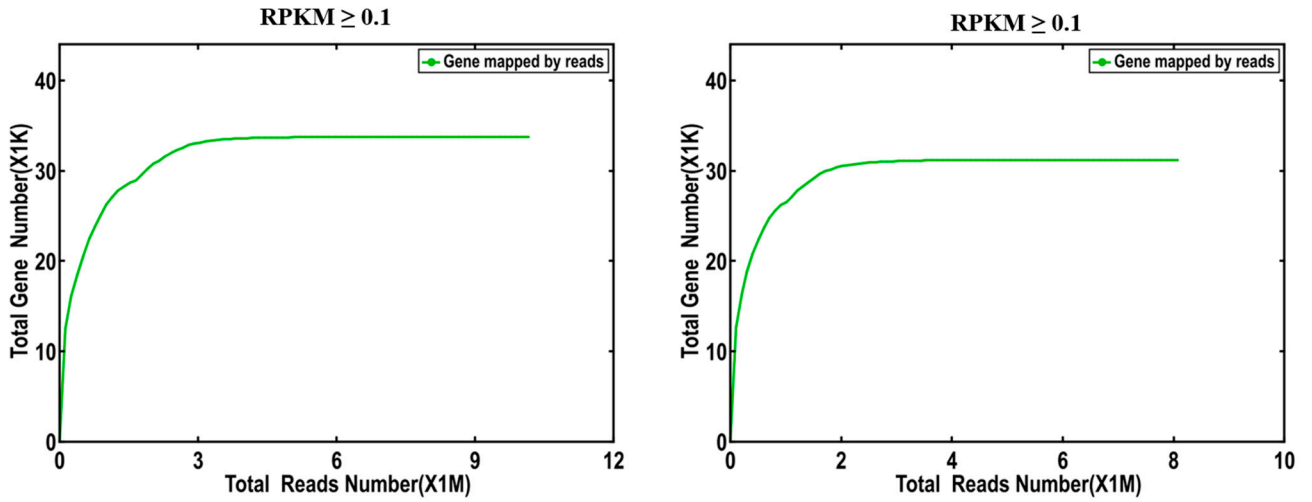

**Figure S3.** Saturation analyses of the CK (left) and CH (right) libraries.

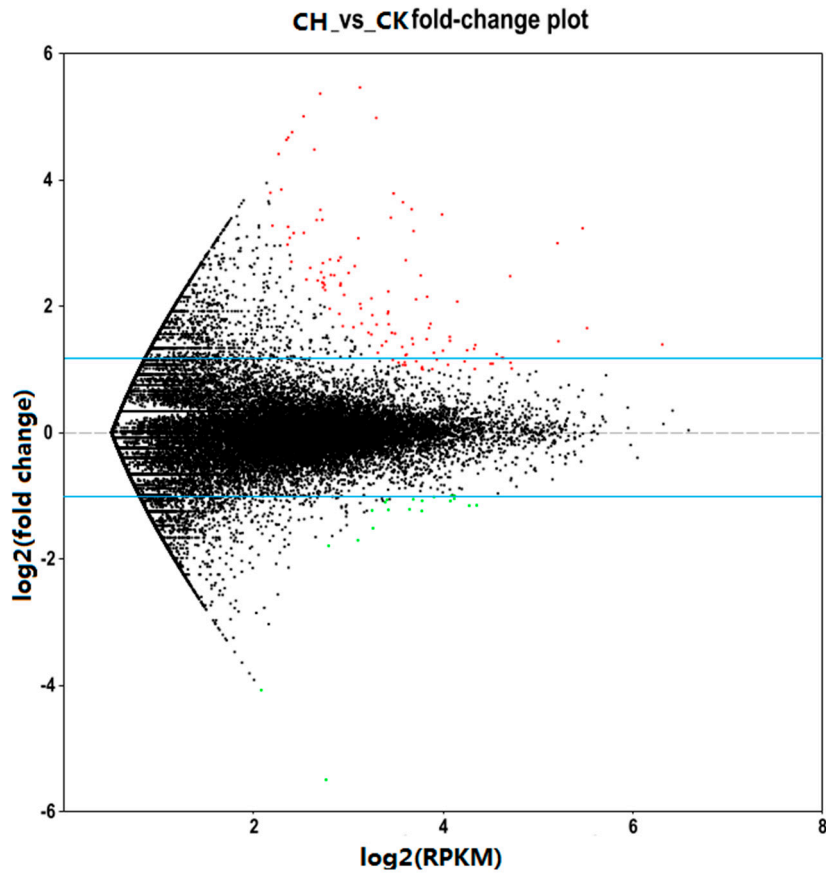

**Figure S4.** Comparison of gene expression levels between CK and CH libraries. Red and green dots represent transcripts more and less prevalent in the CH library, respectively, while black dots indicate transcripts that did not change significantly. The parameters “ $FDR \leq 0.001$ ” and “ $\log_2|\text{Ratio}| \geq 1$ ” were used as the threshold to judge the significance of gene expression differences. The blue lines above and below the zero line indicate 1 and  $-1$ , respectively.

**Table S1.** KEGG classification of ramie genes involved in defense pathways.

| Pathway                                   | Pathway ID | Gene Number |
|-------------------------------------------|------------|-------------|
| ABC transporters                          | ko02010    | 9           |
| Basal transcription factors               | ko03022    | 35          |
| Endocytosis                               | ko04144    | 96          |
| Peroxisome                                | ko04146    | 71          |
| Phagosome                                 | ko04145    | 115         |
| Plant hormone signal transduction         | ko04075    | 158         |
| Plant-pathogen interaction                | ko04626    | 132         |
| Proteasome                                | ko03050    | 58          |
| Regulation of autophagy                   | ko04140    | 22          |
| SNARE interactions in vesicular transport | ko04130    | 22          |
| Spliceosome                               | ko03040    | 156         |
| Ubiquitin mediated proteolysis            | ko04120    | 95          |

**Table S2.** Statistics of mapping DGE reads to reference transcriptome database.

| Sample                   | CK         | Percent | CH        | Percent |
|--------------------------|------------|---------|-----------|---------|
| Total Reads              | 10,155,914 | 100%    | 8,070,704 | 100%    |
| Mapped Reads             | 8,207,281  | 80.81%  | 6,490,444 | 80.42%  |
| Perfect Mapped Reads     | 4,901,290  | 59.72%  | 3,766,310 | 58.03%  |
| Mismatch Reads           | 2,972,932  | 36.22%  | 2,424,148 | 37.35%  |
| Indel Reads              | 164,150    | 2.00%   | 142,049   | 2.19%   |
| Indel and Mismatch Reads | 168,909    | 2.06%   | 157,937   | 2.43%   |
| Identities               | 99.27%     | —       | 99.24%    | —       |

**Table S4.** Primer sequences used in qRT-PCR.

| Genes         | Forward 5'–3'        | Reverse 5'–3'         | Description                                      |
|---------------|----------------------|-----------------------|--------------------------------------------------|
| Unigene5469   | GTGCCAAGGCGAGTCAAG   | GCTCCAAGAGTCCGAAGG    | Ser/Thr-rich protein T10                         |
| Unigene9043   | GAAGGTTCCGAGCCAGAC   | TTCGTTCGCATAGAAGAGTT  | Ethylene-responsive transcription factor         |
| Unigene9323   | GTGGGAACAAATGGAAAT   | TAGCCAACTGTAGGAACT    | Proteinase inhibitor                             |
| Unigene2183   | GGTGTGCTGCTATTGATGTG | GGATGATTGTCGCCCTTA    | Vegetative cell wall protein gp1                 |
| Unigene3206   | GCAAGAGCATCAACCCAGAC | CGTGTTCCTCGGAATTAGC   | Heat shock protein 70 kd                         |
| Unigene13732  | TTCCCGCCCAGGTCCTTCCA | TCACCATAATGTACCGCCAAA | Polyphenoloxidase                                |
| Unigene19135  | AGCCAAGGACATTAACAA   | CGGAAGAATACGGCGAGA    | Trypsin inhibitor                                |
| Unigene24094  | GTAGTCGCAGTTTCCTCC   | GAATGTCGGTAACCCTCC    | Chitinase                                        |
| Unigene9085   | ACAAGCCACCACCAACCC   | ACTATTGGCGGAAGCGTA    | Proline-rich cell wall protein                   |
| Unigene7762   | TATGACCTCCGCCGTTGA   | CCACCACCAGAAGCACCA    | Superoxide dismutase                             |
| Unigene11292  | CACGCGGATTTAGACATA   | GTGAAGGCGAAACAGCAA    | Cysteine proteinase inhibitor                    |
| Unigene21351  | GTTGATGATGGCTGGGTT   | CGACATGGCTCTGTTCTT    | Scarecrow-like protein 13-like                   |
| Unigene13343  | TCTGTGGTCAATGGAGGCG  | GGAGAACTTTGCGGTGGG    | Non-specific lipid-transfer protein-like protein |
| Unigene22463  | GAGGCGGATCGAGAAGGA   | GCTCATAAGGCAACACCC    | Lipoxygenase                                     |
| Unigene6416   | TGCGGGTCCCAGTGTCTT   | CTTGCCGTTGGTTTCGTCT   | Nod26-like protein                               |
| <i>Actin1</i> | AGTGGAGAAGCGTGGTTT   | ATGAATGACGATAATGGC    | Actin 1                                          |
